# Supplementary material for: Adsorption and dynamics of linear and mono-branched hexane isomers in MIL-140 metal–organic frameworks
Source: Royal Society of Chemistry journal article supplement (doi:10.1039/d2cp05371c), 2023-01-01
Supplement: d2cp05371c1.pdf [file d2cp05371c1.pdf]

# Supporting Information: Adsorption and Dynamics of linear and mono-branched hexane Isomers in MIL-140 Metal-Organic Frameworks

Hengli Zhao,<sup>†,‡</sup> José A. C. Silva,<sup>¶,§</sup> Adriano Henrique,<sup>¶,§</sup> Farid Nouar,<sup>||</sup>

Christian Serre,<sup>||</sup> Guillaume Maurin,<sup>\*,‡</sup> and Aziz Ghoufi<sup>\*,†</sup>

*†Institut de Physique de Rennes, IPR, CNRS-Université de Rennes 1, UMR CNRS  
6251, 35042 Rennes, France.*

*‡ICGM, Univ. Montpellier, CNRS, ENSCM, Montpellier, France.*

*¶Centro de Investigação de Montanha (CIMO), Instituto Politécnico de Bragança,  
Campus de Santa Apolónia, 5300-253 Bragança, Portugal.*

*§Laboratório Associado para a Sustentabilidade e Tecnologia em Regiões de Montanha  
(SusTEC), Instituto Politécnico de Bragança, Campus de Santa Apolónia, 5300-253  
Bragança, Portugal.*

*||Institut des Matériaux Poreux de Paris, Ecole Normale Supérieure de Paris, ESPCI  
Paris, CNRS, PSL University, 75005 Paris, France.*

E-mail: guillaume.maurin1@umontpellier.fr; aziz.ghoufi@univ-rennes1.fr

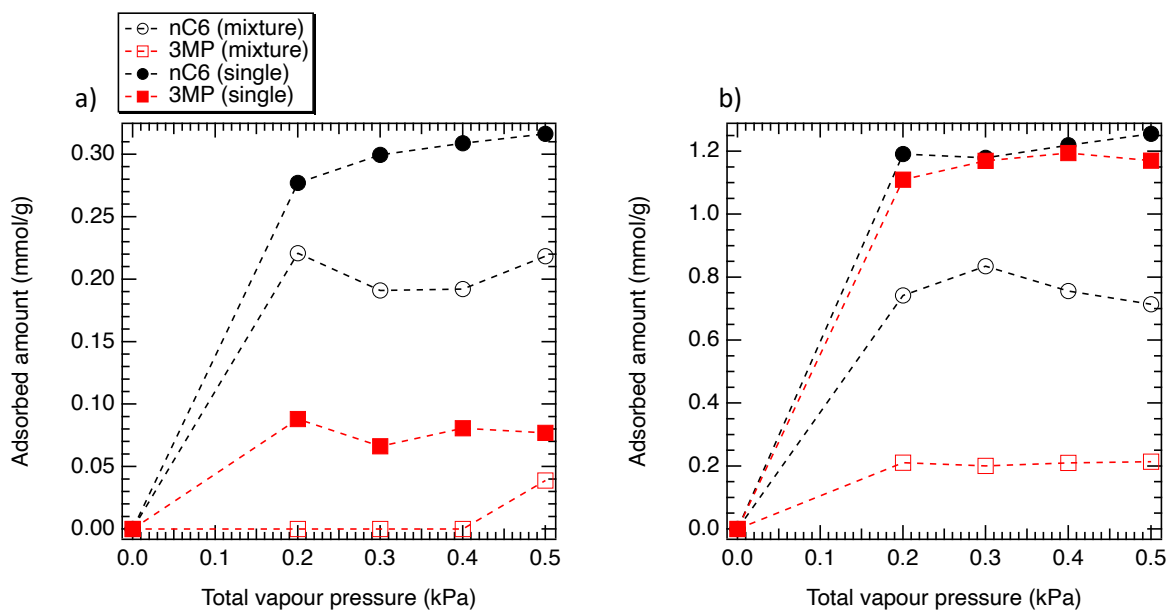

Figure S1: HOMO calculated single and C6/3MP binary component adsorption isotherms of hexane isomers at 343K for a) MIL-140B and b) MIL-140C MOF materials.
